# Supplementary material for: A combined DFT and experimental study on the nucleation mechanism of NiO nanodots on graphene
Source: Royal Society of Chemistry journal article supplement (doi:10.1039/c8ta03451f), 2018-01-01
Supplement: c8ta03451f1.pdf [file c8ta03451f1.pdf]

Journal Name

ARTICLE

## Combined DFT and experimental study on nucleation mechanism of NiO nanodots on graphene

Yulan Lu,<sup>a,b</sup> Lijun Su,<sup>b,c</sup> Jing Qi,<sup>\*a</sup> Shulai Lei,<sup>\*b</sup> Bao Liu,<sup>b,c</sup> Qi Zang,<sup>d</sup> Siqi Shi,<sup>e</sup> and Xingbin Yan<sup>b</sup>

- a. School of Physical Science and Technology, Lanzhou University, Lanzhou, 730000, China
- b. Laboratory of Clean Energy Chemistry and Materials, State Key Laboratory of Solid Lubrication, Lanzhou Institute of Chemical Physics, Chinese Academy of Sciences, Lanzhou, 730000, P. R. China
- c. University of Chinese Academy of Sciences, Beijing 100039, P. R. China
- d. School of Materials Science and Engineering, Northwest Normal University, Lanzhou, 730070, China
- e. School of Materials Science and Engineering, Shanghai University, Shanghai, 200444, P. R. China

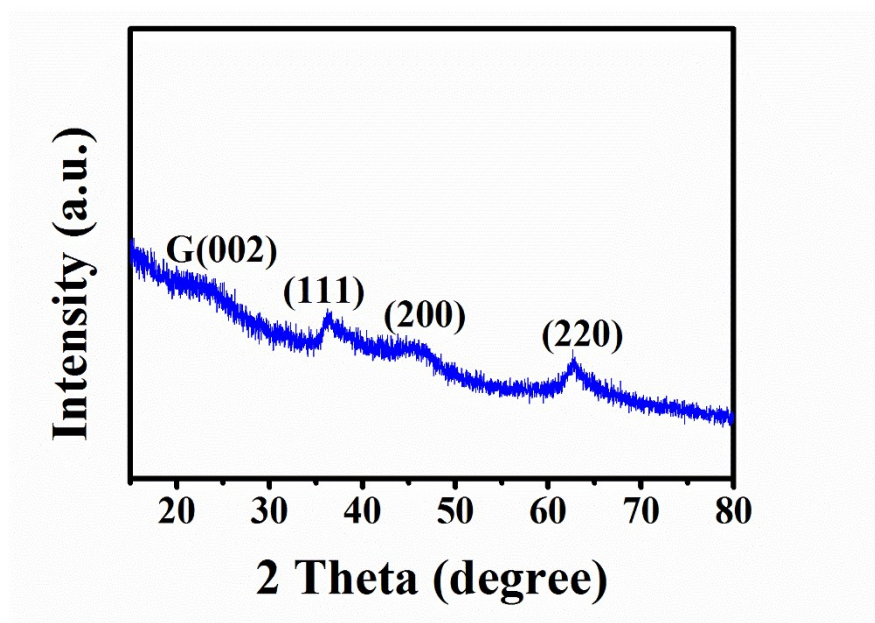

**Fig. S1** X-ray diffraction (XRD) patterns of NiO NDs@rGO. The three main peaks can be indexed to the NiO phase (space group Fm-3m, JCPDS 47-1049). And the weak and broad peak at  $2\theta$  around  $24^\circ$  refers to disorderedly stacked graphene sheets, demonstrating the presence of NiO NDs and rGO.

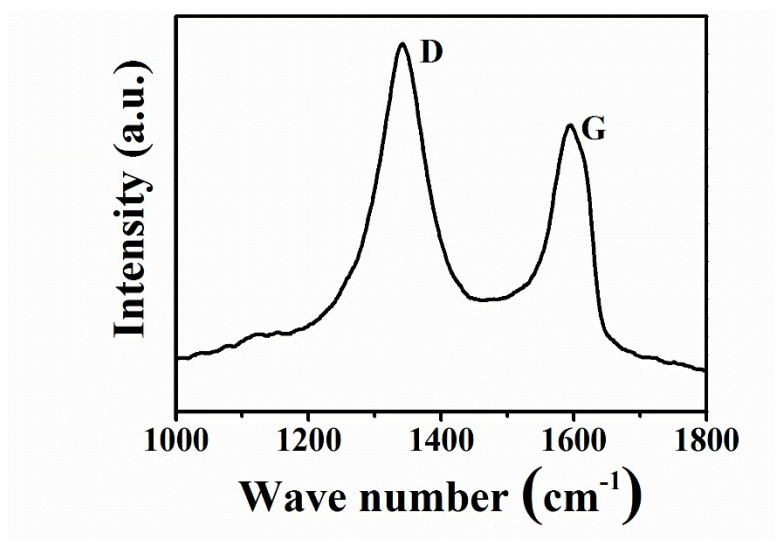

**Fig. S2** The Raman spectra of NiO NDs@rGO composite. It can be seen that there are obvious characteristic peaks of disorder-induced D band and order-induced G band at 1350 and 1580 cm<sup>-1</sup>, respectively.<sup>1</sup> Moreover, the intensity ratio of the D peak over the G peak ( $I_D/I_G$ ) is 1.3, indicating that there are many defects on the surface of the rGO, such as vacancies<sup>2</sup>, topological defects<sup>3</sup> and oxygen-containing functional groups<sup>4,5</sup>.

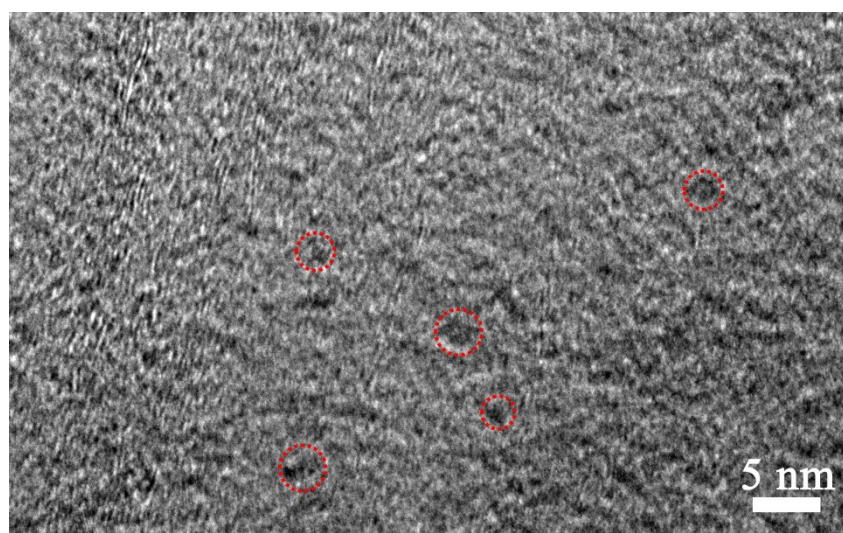

**Fig. S3** TEM images of NiO NDs@rGO composite. The red circles indicate some NiO NDs.

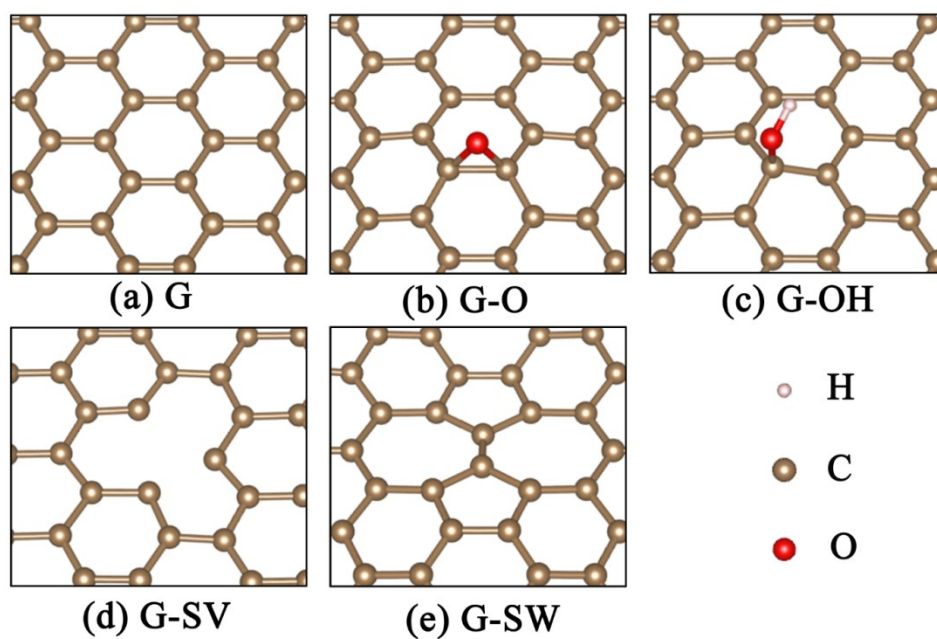

**Fig. S4** Relaxed lattice structure of perfect graphene and graphene loaded with four different kinds of point defects.

**Table. S1** The Elemental composition of various atoms present on the NiO NDs@rGO composites surface characterized by XPS.

| Name     | C 1s  | N 1s | Ni 2p | O 1s  |
|----------|-------|------|-------|-------|
| Atomic % | 67.25 | 3.72 | 6.4   | 22.63 |

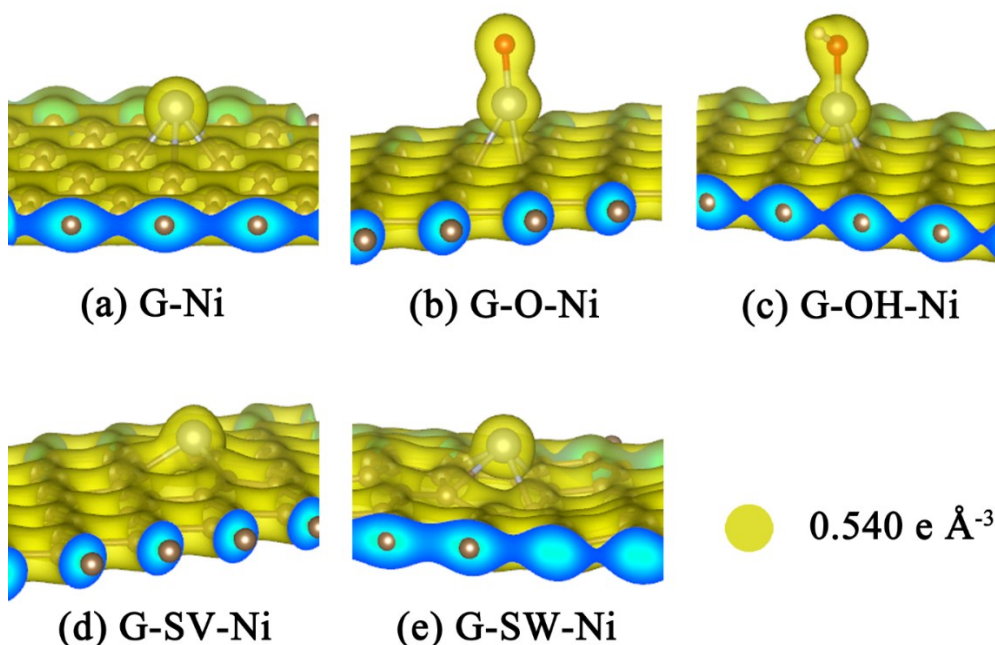

**Fig. S5** The valence charge density distribution diagrams. For G-Ni, there is only a weak electron cloud overlap between the Ni and graphene. In contrast, for G-O-Ni and G-OH-Ni, there is a considerable overlap between Ni atom and neighbouring C atoms. In the case of the G-SV-Ni, it is observed that the strongest overlap locates on Ni and three dangling C bonds. The larger the overlapping area of charge density, the stronger the covalent interaction, this is consistent with absorption energy calculation results.

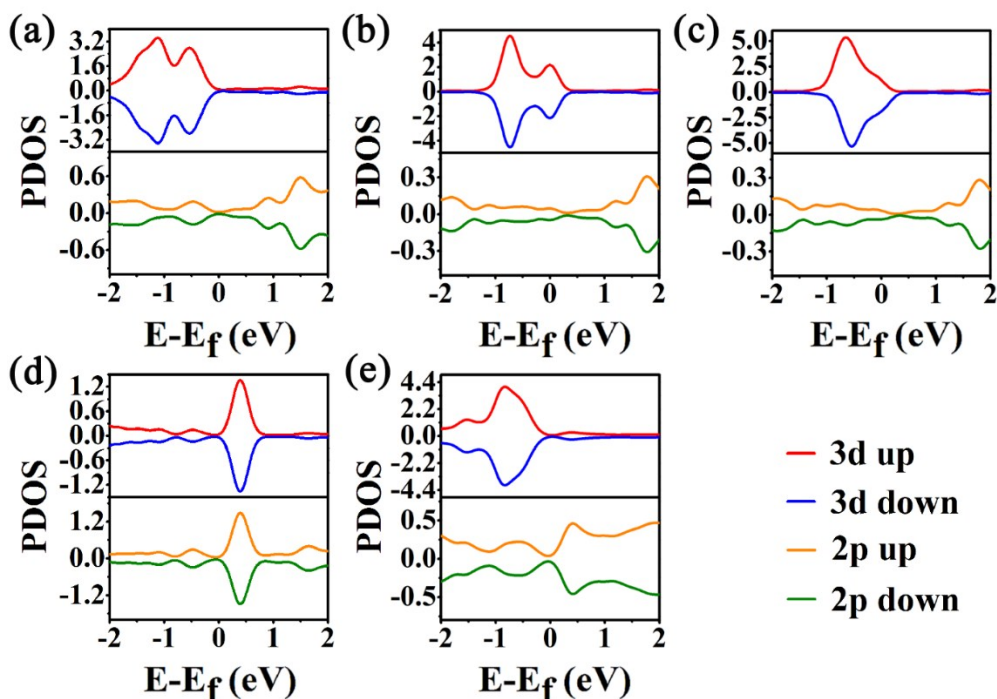

**Fig. S6** The partial densities of states (PDOS) of Ni 3d orbital and C 2p orbital at the (a) G-Ni, (b) G-O-Ni, (c) G-OH-Ni, (d) G-SV-Ni, and (e) G-SW-Ni interface. It shows that the spin states of the 3d orbital of the Ni atom and the 2p orbital of the neighbouring C atoms are near the interface. The Ni 3d orbital partially hybridizes with the adjacent C 2p orbital, which is a typical Ni-C covalent bond characterization. In particular, due to the orbital of Ni 3d orbital partially hybridized with the dangling C bonds to form Ni-C bonds, in which the interaction is the strongest, the PDOS of adjacent C atoms match consistently with and Ni 3d orbital in G-SV-Ni.

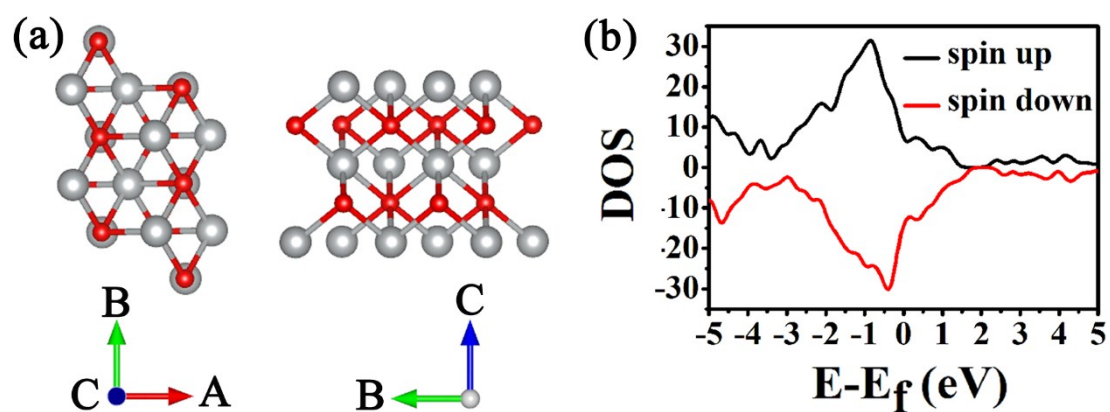

Fig. S7 (a) The structures in top and side view and (b) the densities of states (DOS) of NiO cluster.

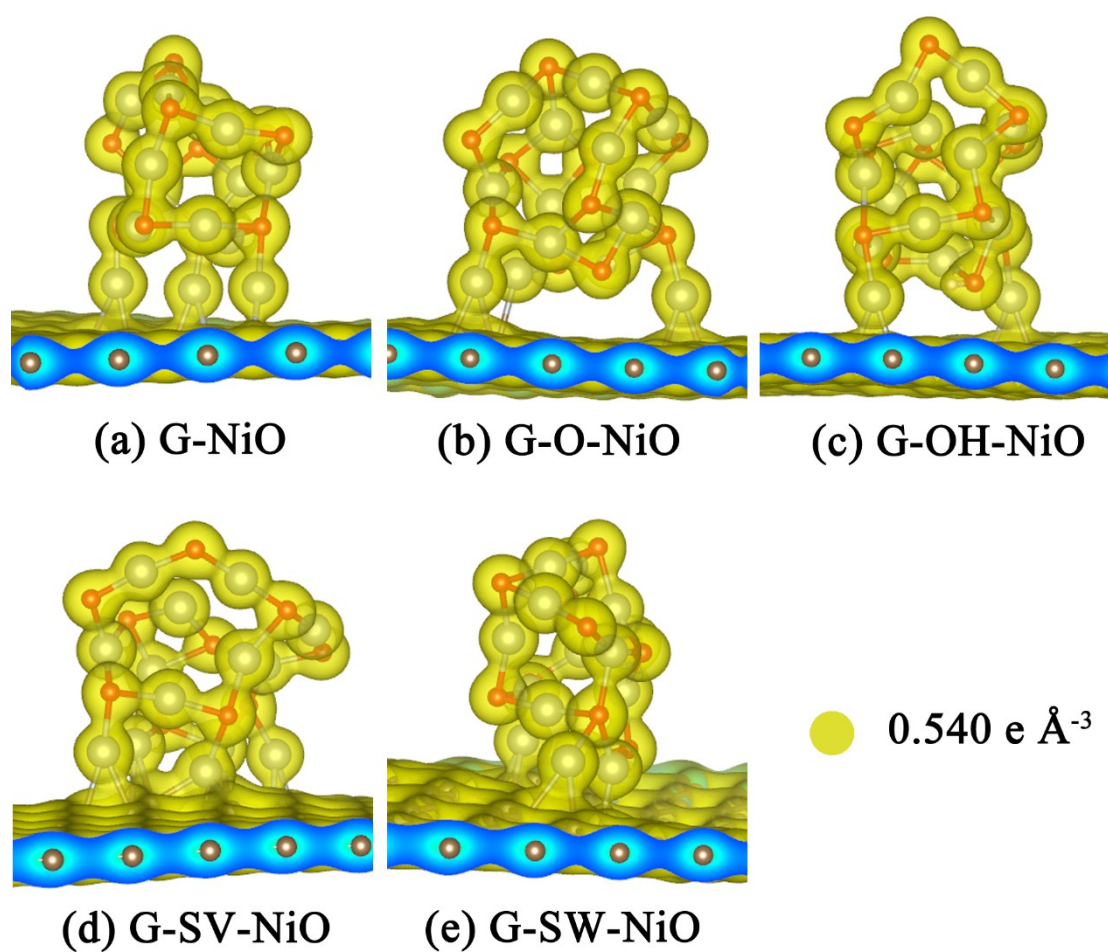

Fig. S8 The valence electron density for (a) G-NiO, (b) G-O-NiO, (c) G-OH-NiO, (d) G-SV-NiO, (e) G-SW-NiO.

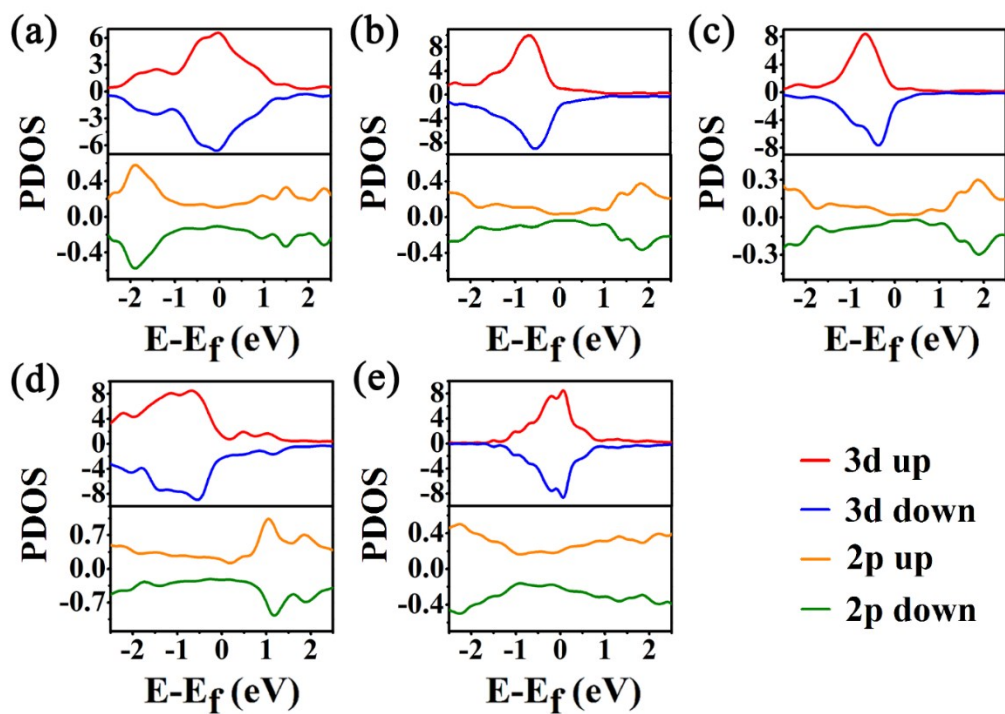

**Fig. S9** The PDOS of Ni 3d orbital and C 2p orbital at the (a) G-NiO, (b) G-O-NiO, (c) G-OH-NiO, (d) G-SV-NiO, and (e) G-SW-NiO interface. PDOS is taken to highlight the effects of the interfacial interaction. Similar to a system that adsorbs one Ni atom, the 3d orbital of the Ni atoms and the 2p orbital of the C atoms are hybridized, which is the source of the adsorption energies. Not surprisingly, G-SV-NiO has the most intense Ni 3d orbital and C 2p orbital hybridization.

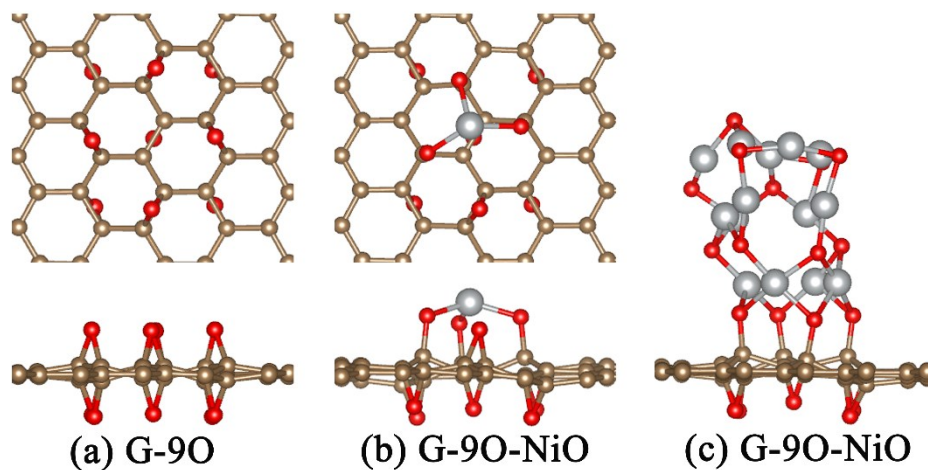

**Fig. S10** Relaxed lattice structure of (a) G-9O: The graphene surface is locally loaded with 9 epoxy groups.<sup>6</sup> (b) G-9O-Ni: Ni atoms are bonded to three epoxy groups on the substrate to form Ni-O-C bonds with the absorption energy of -3.88 eV. (c) G-9O-NiO: NiO clusters are attached to four epoxy groups on the substrate to form Ni-O-C bonds with the absorption energy of -5.26 eV.

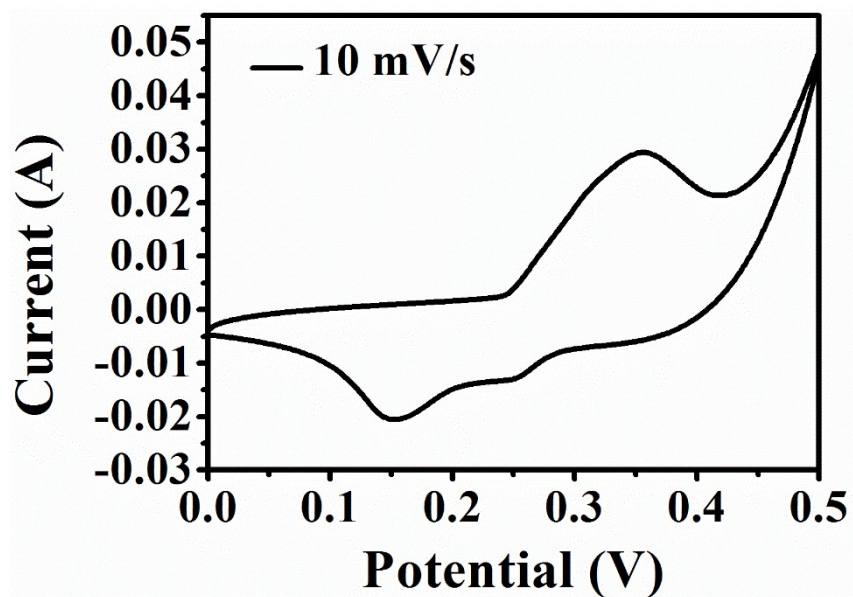

**Fig. S11** The cyclic voltammetry curves of NiO NDs@rGO at 10 mV s<sup>-1</sup>.

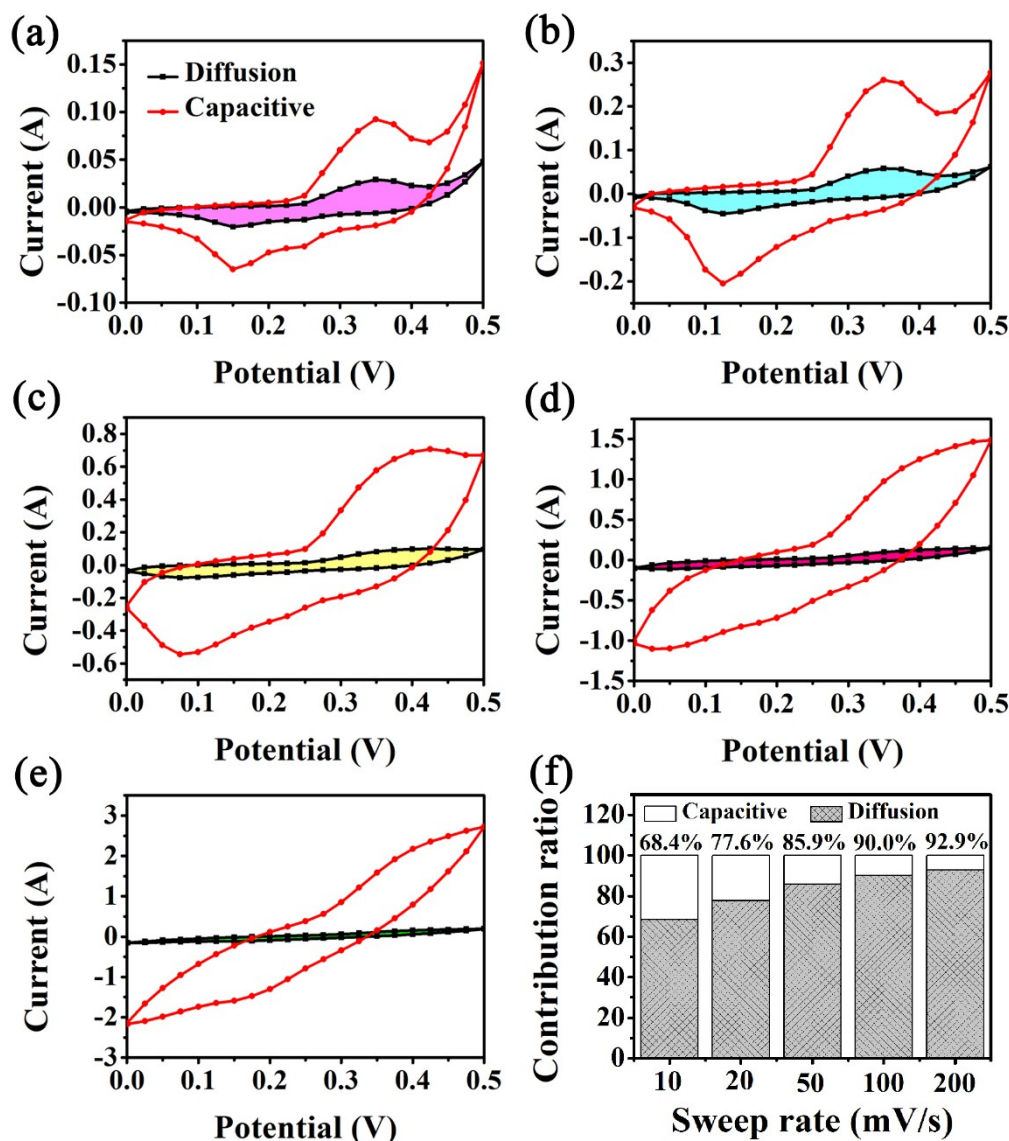

**Fig. S12** Cyclic voltammetry of NiO NDs@rGO composite at (a) 10 mV s<sup>-1</sup>, (b) 20 mV s<sup>-1</sup>, (c) 50 mV s<sup>-1</sup>, (d) 100 mV s<sup>-1</sup>, (e) 200 mV s<sup>-1</sup>, and (f) separation of capacitive charge and diffusion-controlled at different sweep rate. The shadow area represents the capacitive contribution.

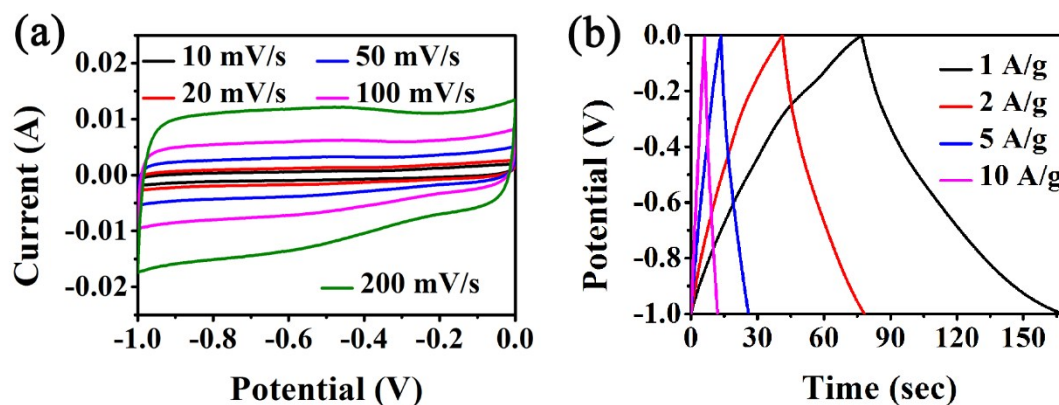

**Fig. S13** The Electrochemical properties of pure rGO. (a) CV curves of rGO at various scan rates. (b) Charge-discharge curves at different current densities.



**Table. S2** The comparison of the electrochemical performance of reported NiO/G composite in recent papers and our results.

| NiO/G                       | Electrolyte potential range | Specific capacitance                                | Rate capability                  | Cycling stability                                    | years              |
|-----------------------------|-----------------------------|-----------------------------------------------------|----------------------------------|------------------------------------------------------|--------------------|
| RGO-NiO                     | 6 M KOH<br>0.05-0.55 V      | 576 F g <sup>-1</sup> at<br>1 A g <sup>-1</sup>     | 70% at<br>10 A g <sup>-1</sup>   | 100% after 1100<br>cycles at 1 A g <sup>-1</sup> .   | 2012 <sup>7</sup>  |
| NiO nanoflakes/graphene     | 6 M KOH<br>0-0.5 V          | 274 F g <sup>-1</sup> at<br>1 A g <sup>-1</sup>     | 80% at<br>10 A g <sup>-1</sup>   | 100-120% after<br>1500 cycles at 5 A g <sup>-1</sup> | 2013 <sup>8</sup>  |
| 3D NiO-graphene             | 2 M KOH<br>0-0.45 V         | 651 F g <sup>-1</sup> at<br>1 A g <sup>-1</sup>     | 46% at<br>20 A g <sup>-1</sup>   | 80% after 2000<br>cycles at 2 A g <sup>-1</sup>      | 2014 <sup>9</sup>  |
| 3D NiO/UDG/NF               | 5 M KOH<br>0-0.4 V          | 425 F g <sup>-1</sup> at<br>2 A g <sup>-1</sup>     | 70.6% at<br>10 A g <sup>-1</sup> | 79% after 2000<br>cycles at 10 A/g                   | 2014 <sup>10</sup> |
| RG/NiO                      | 5 M NaOH<br>0-0.8 V         | 617 F g <sup>-1</sup> at<br>1 A g <sup>-1</sup>     | —                                | 94% after 5000<br>cycles at 1 A g <sup>-1</sup> .    | 2014 <sup>11</sup> |
| Graphene/NiO Nanowires      | 6 M KOH<br>0-0.5 V          | 628 F g <sup>-1</sup> at<br>1 A g <sup>-1</sup>     | 67.4% at<br>15 A g <sup>-1</sup> | 82.4% after 3000<br>cycles at 1 A g <sup>-1</sup>    | 2014 <sup>12</sup> |
| 3D-RGNi                     | 2 M KOH<br>-0.1-0.35 V      | 1328 F g <sup>-1</sup> at<br>1 A g <sup>-1</sup>    | 62% at<br>10 A g <sup>-1</sup>   | 87% after 2000<br>cycles at 2 A g <sup>-1</sup>      | 2015 <sup>13</sup> |
| NiO nanoflake - 3D graphene | 1 M NaOH<br>0-0.6 V         | 1829 F g <sup>-1</sup> at<br>3 A g <sup>-1</sup>    | 55 % at<br>15 A g <sup>-1</sup>  | 85% after 5000<br>cycles at 15 A g <sup>-1</sup>     | 2015 <sup>14</sup> |
| G@NiO nanosheet             | 2 M KOH<br>0-0.4 V          | 1073 C g <sup>-1</sup> at<br>1 A g <sup>-1</sup>    | 59% at<br>20 A g <sup>-1</sup>   | 99% after 10000<br>cycles at 10 A g <sup>-1</sup>    | 2017 <sup>15</sup> |
| NiO NDs@rGO                 | 2 M KOH<br>0-0.35 V         | 1020.28 F g <sup>-1</sup> at<br>1 A g <sup>-1</sup> | 92% at<br>10 A g <sup>-1</sup>   | 78% after 2000<br>cycles at 5 A g <sup>-1</sup>      | this work          |

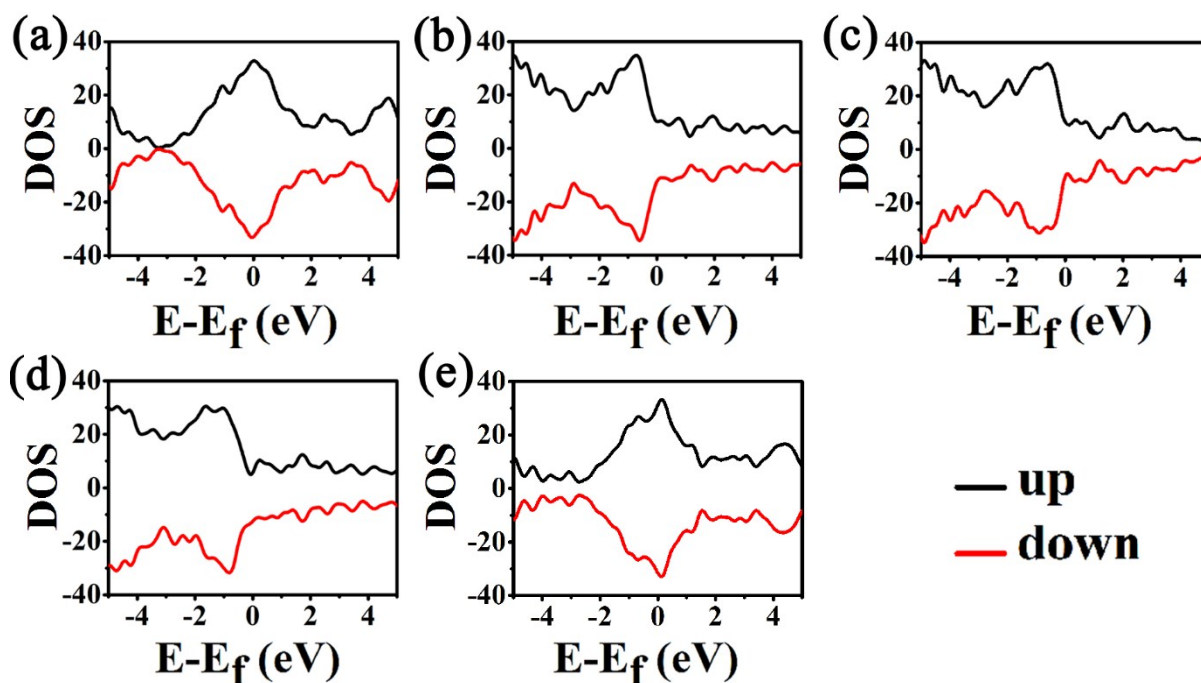**Fig. S14** The DOS of (a) G-NiO, (b) G-O-NiO, (c) G-OH-NiO, (d) G-SV-NiO, and (e) G-SW-NiO.

## References

- 1 Ferrari, A. C.; Meyer, J. C.; Scardaci, V.; Casiraghi, C.; Lazzeri, M.; Mauri, F.; Piscanec, S.; Jiang, D.; Novoselov, K. S.; Roth, S.; Geim, Phys. Rev. Lett. 2006, 97, 187401–187404.
- 2 F. Banhart, J. Kotakoski and A. V. Krasheninnikov, *ACS Nano*, 2011, **5**, 26-41.
- 3 K. Suenaga, H. Wakabayashi, M. Koshino, Y. Sato, K. Urita and S. Iijima, *Nat. Nanotechnol.*, 2007, **2**, 358-360.
- 4 L. Shahriary and A. A. Athawale, *Int. J. Renew. Energy Environ. Eng*, 2014, **2**, 58-63.
- 5 A. Bagri, C. Mattevi, M. Acik, Y. J. Chabal, M. Chhowalla and V. B. Shenoy, *Nat. Chem.*, 2010, **2**, 581.
- 6 Ž. Šljivančanin, A. S. Milošević, Z. S. Popović and F. R. Vukajlović, *Carbon*, 2013, **54**, 482-488.
- 7 Y. Y. Yang, Z. A. Hu, Z. Y. Zhang, F. H. Zhang, Y. J. Zhang, P. J. Liang, H. Y. Zhang and H. Y. Wu, *Mater. Chem. Phys.*, 2012, **133**, 363-368.
- 8 Y. G. Zhu, G. S. Cao, C. Y. Sun, J. Xie, S. Y. Liu, T. J. Zhu, X. B. Zhao and H. Y. Yang, *RSC Adv.*, 2013, **3**, 19409-19415.
- 9 M. L. Huang, C. D. Gu, X. Ge, X. L. Wang and J. P. Tu, *J. Power Sources*, 2014, **259**, 98-105.
- 10 C. H. Wu, S. X. Deng, H. Wang, Y. X. Sun, J. B. Liu and H. Yan, *ACS Appl. Mater. Interfaces*, 2014, **6**, 1106.
- 11 Y. Chen, Z. Huang, H. Zhang, Y. Chen, Z. Cheng, Y. Zhong, Y. Ye and X. Lei, *Int. J. Hydrogen Energy*, 2014, **39**, 16171-16178.
- 12 D. T. Dam, X. Wang and J. M. Lee, *ACS Appl. Mater. Interfaces*, 2014, **6**, 8246.
- 13 N. B. Trung, T. V. Tam, D. K. Dang, K. F. Babu, E. J. Kim, J. Kim and W. M. Choi, *Chem. Eng. J.*, 2015, **264**, 603-609.
- 14 C. Wang, J. Xu, M. F. Yuen, J. Zhang, Y. Li, X. Chen and W. Zhang, *Adv. Funct. Mater.*, 2015, **24**, 6372-6380.
- 15 J. Lin, H. Jia, H. Liang, S. Chen, Y. Cai, J. Qi, C. Qu, J. Cao, W. Fei and J. Feng, *Adv. Sci.*, 2017, **5**, 1700687.
